# Supplementary material for: Conserving relics from ancient underground worlds: assessing the influence of cave and landscape features on obligate iron cave dwellers from the Eastern Amazon
Source: PeerJ journal article supplement (doi:10.7717/peerj.4531), 2018-03-20
Supplement: Troglogites_Jaffe_Pj_SI_Figs.pdf [file Troglogites_Jaffe_Pj_SI_Figs.pdf]

## Supplemental Figures

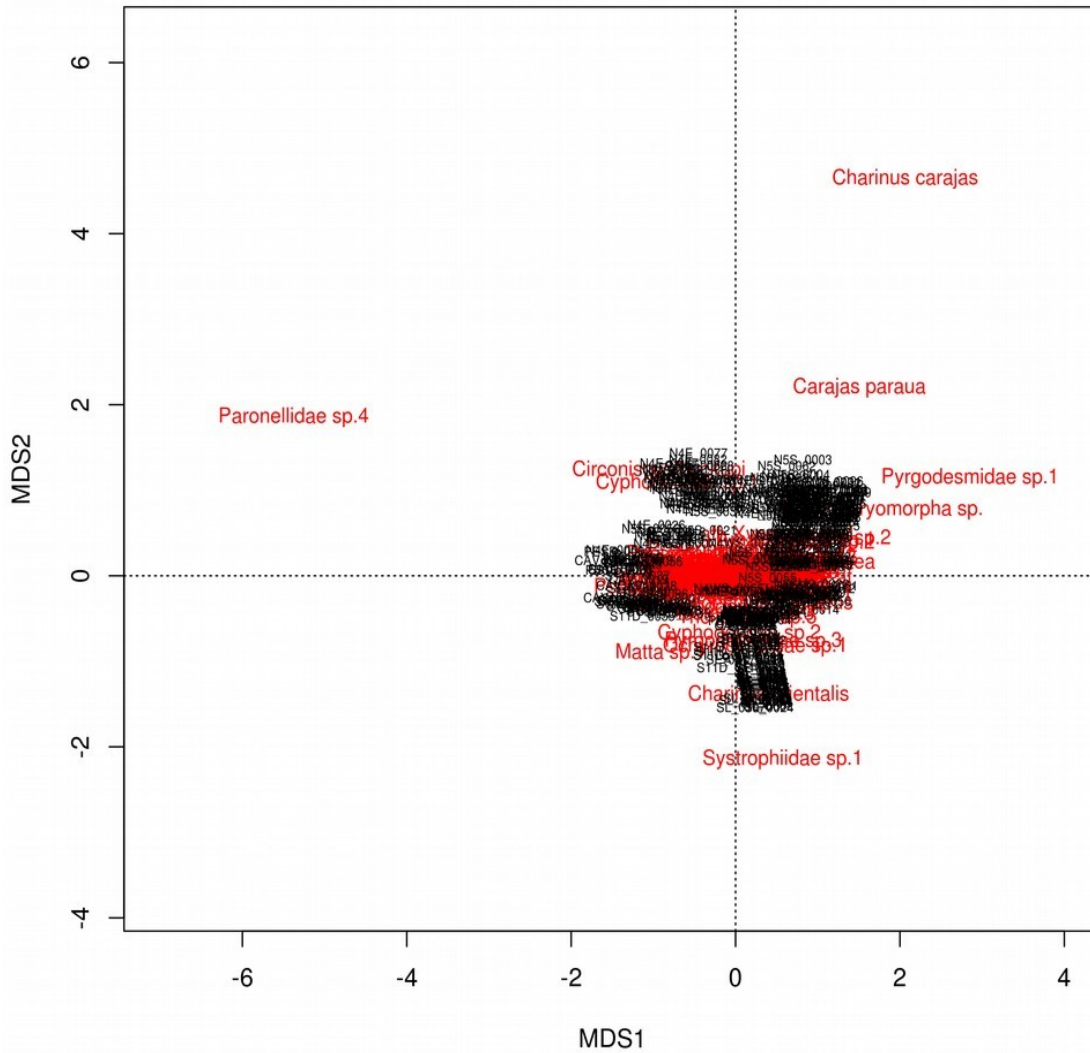

**Figure S1:** Principal coordinate analysis showing the distribution of some troglobitic species across the studied caves. Caves plotted in the same direction as specific troglobitic species actually contain those species.

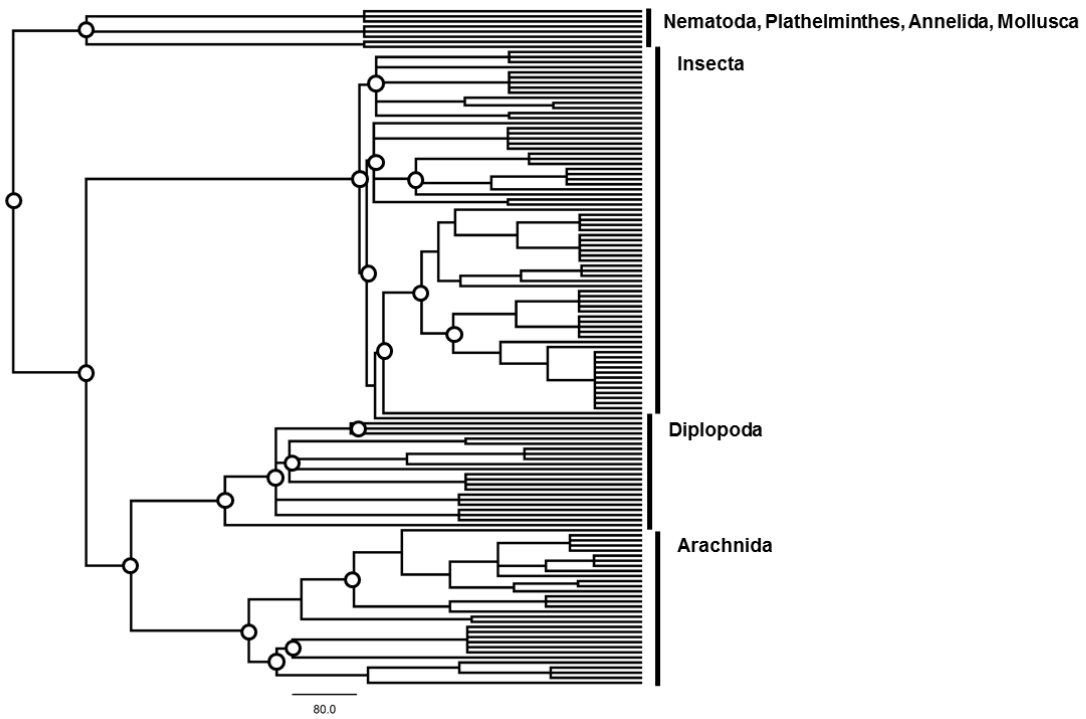

**Figure S2:** Phylogeny for the troglobitic species included in this study, retrieved from Hedges & Kumar (2009). Circles indicate dated nodes, while further nodes are evenly distributed among two dated nodes.

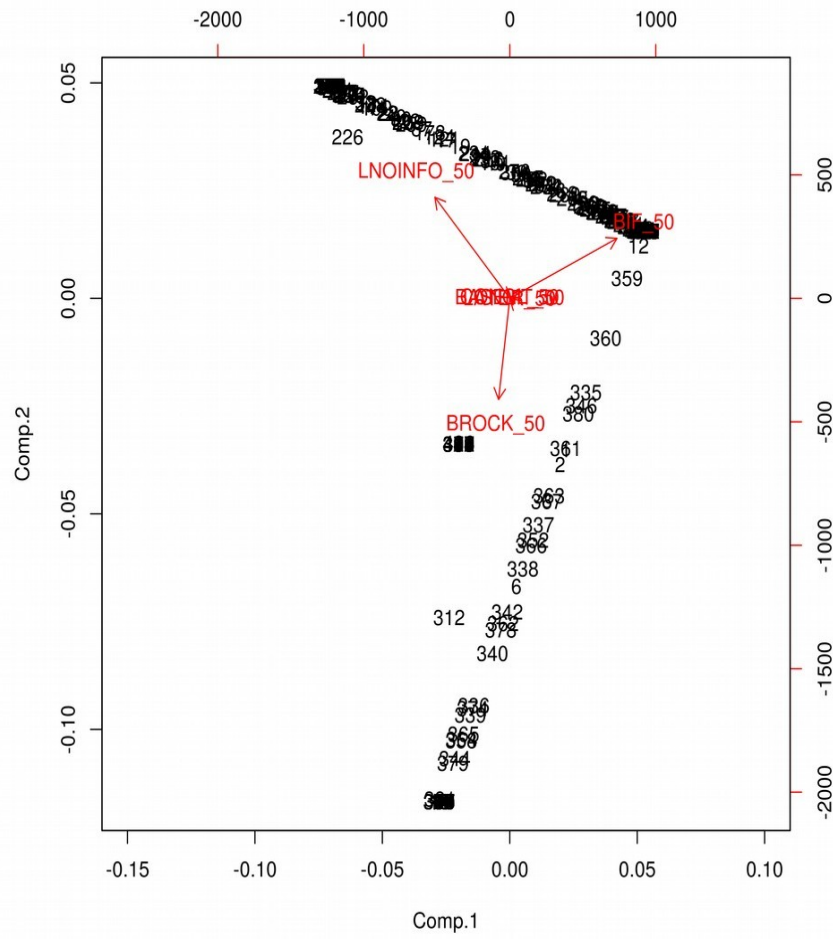

**Figure S3:** Plot showing the first two principal components of lithology variables (see Table S1 for full code legends).

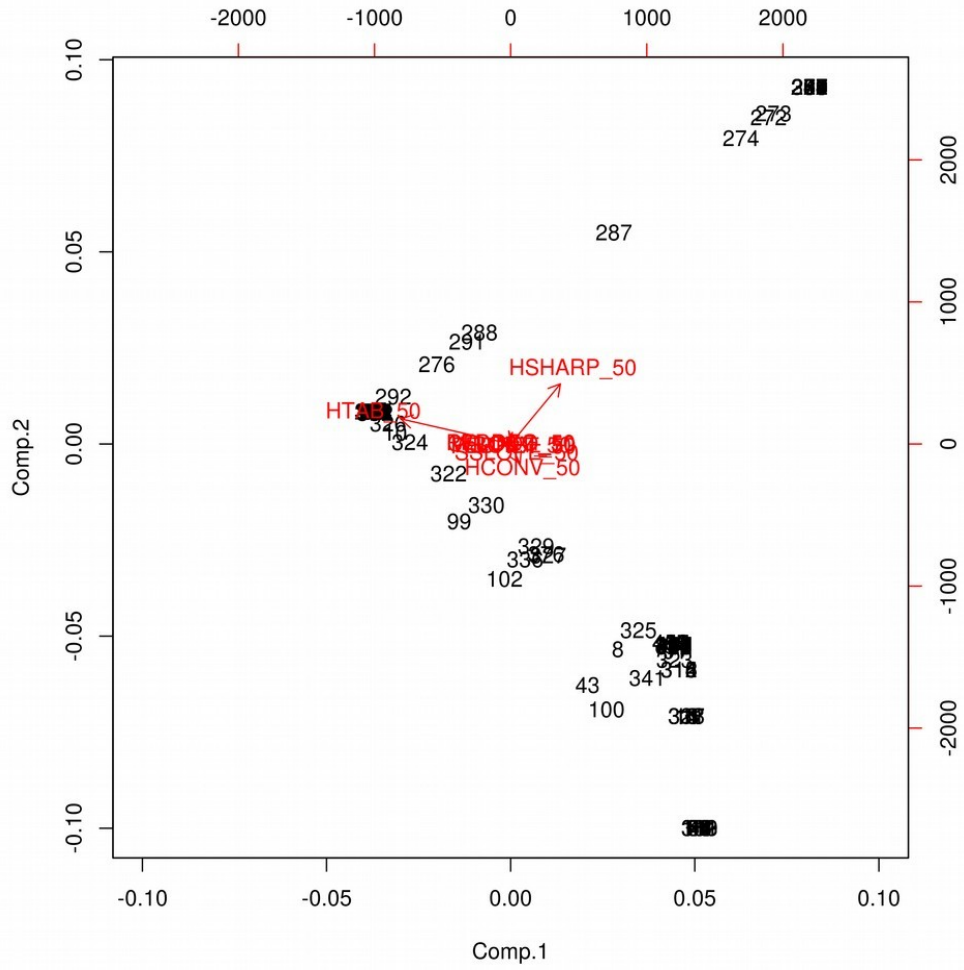

**Figure S4:** Plot showing the first two principal components of geomorphology variables (see Table S1 for full code legends).
