# Supplementary material for: Conserving relics from ancient underground worlds: assessing the influence of cave and landscape features on obligate iron cave dwellers from the Eastern Amazon
Source: PeerJ journal article supplement (doi:10.7717/peerj.4531), 2018-03-20
Supplement: Troglogites_Jaffe_Pj_SI_Tables_rev.pdf [file Troglogites_Jaffe_Pj_SI_Tables_rev.pdf]

## Supplemental Tables

**Table S1:** Summary of all cave and landscape metrics.

| <b>Variable</b>            | <b>Description</b>                                                                                                                                              | <b>Values (min / max)</b> | <b>Code</b> |
|----------------------------|-----------------------------------------------------------------------------------------------------------------------------------------------------------------|---------------------------|-------------|
| Species composition - MDS1 | Scores calculated from Non-metric multidimensional scaling Axis 1 - continuous variable                                                                         | -0.021 / 1.191            | MDS1        |
| Species composition - MDS2 | Scores calculated from Non-metric multidimensional scaling Axis 2 - continuous variable                                                                         | -0.013 / 1.424            | MDS2        |
| Species richness           | The number of troglobites species                                                                                                                               | 1.000 / 16.000            | TrogRich    |
| Rarity-weighted richness   | Sum of the weighted number of species, where each species is divided by the total number of sites (caves) where it occurs                                       | 0.05 / 4.13               | Wrich       |
| Phylogenetic diversity     | Minimum total length of all the phylogenetic branches required to span a given set of taxa on the phylogenetic tree from a set of species - continuous variable | 789.999 / 6713.199        | pd.obs      |
| Highland                   | Canga highland representing geological units                                                                                                                    | -                         | Highland    |
| Latitude                   | Decimal Geographic Coordinate System - continuous variable                                                                                                      | -49.583, -50.383          | Long        |
| Latitude                   | Decimal Geographic Coordinate System - continuous variable                                                                                                      | -5.893, -6.456            | Lat         |
| Altitude                   | The height above sea level where the cave is located (m). Vertical datum: Imbituba (SC) - continuous variable                                                   | 224.000 / 842.000         | Altitude    |
| Horizontal length          | The horizontal length of the cave from the entrance (m) - continuous variable                                                                                   | 4.000 / 1546.000          | HP          |
| Slope                      | The steepness length of cave terrain (m) - continuous variable                                                                                                  | 0.100 / 38.200            | Slope       |
| Area                       | Cave area (m <sup>2</sup> ) - continuous variable                                                                                                               | 7.000 / 4224.000          | Area        |
| Volume                     | Cave volume (m <sup>3</sup> ) - continuous variable                                                                                                             | 5.000 / 4340.000          | Volume      |
| Percolating waters         | Presence/absence of percolating waters - categorical variable                                                                                                   | yes/no                    | PW          |
| Water reservoirs           | Presence/absence of water reservoirs - categorical variable                                                                                                     | yes/no                    | WR          |
| Vegetal material           | Presence/absence of vegetal material - categorical variable                                                                                                     | yes/no                    | Veg         |
| Detritus                   | Presence/absence of detritus - categorical variable                                                                                                             | yes/no                    | Det         |
| Roots                      | Presence/absence of roots - categorical variable                                                                                                                | yes/no                    | Root        |

|                                        |                                                                                                                                            |               |                 |
|----------------------------------------|--------------------------------------------------------------------------------------------------------------------------------------------|---------------|-----------------|
| Bat feces                              | Presence/absence of bat feces - categorical variable                                                                                       | yes/no        | Guano           |
| Other feces                            | Presence/absence of other feces - categorical variable                                                                                     | yes/no        | Ofez            |
| Regurgitation balls                    | Presence/absence of regurgitation balls - categorical variable                                                                             | yes/no        | RB              |
| Carcasses                              | Presence/absence of carcasses - categorical variable                                                                                       | yes/no        | Car             |
| Bat populations                        | Presence/absence of bat populations - categorical variable                                                                                 | yes/no        | BATPOP          |
| Cave area vs buffer area - Base 50m    | Sum of cave area within a radius of a buffer area of 50m (km <sup>2</sup> ) - continuous variable                                          | 0.001 / 1.000 | area_vs_buff50  |
| Cave area vs buffer area - Base 100m   | Sum of cave area within a radius of a buffer area of 100m (km <sup>2</sup> ) - continuous variable                                         | 0.000 / 1.804 | area_vs_buff100 |
| Cave area vs buffer area - Base 250m   | Sum of cave area within a radius of a buffer area of 250m (km <sup>2</sup> ) - continuous variable                                         | 0.000 / 1.586 | area_vs_buff250 |
| Cave area vs buffer area - Base 500m   | Sum of cave area within a radius of a buffer area of 500m (km <sup>2</sup> ) - continuous variable                                         | 0.000 / 0.018 | area_vs_buff500 |
| Cave declivity 0- 10 (%)               | The steepness length of cave terrain measured by laser scanning within a radius of a buffer area of 50m / 0-10 (%) - continuous variable   | 0.000 / 1.000 | DCL_0_10B50     |
| Cave declivity 1-20 (%)                | The steepness length of cave terrain measured by laser scanning within a radius of a buffer area of 50m / 10-20 (%) - continuous variable  | 0.000 / 1.000 | DCL_10_20B50    |
| Cave declivity 20 - 30 (%) - Base 50m  | The steepness length of cave terrain measured by laser scanning within a radius of a buffer area of 50m / 20-30 (%) - continuous variable  | 0.000 / 1.000 | DCL_20_30B50    |
| Cave declivity 0 - 10 (%) - Base 100m  | The steepness length of cave terrain measured by laser scanning within a radius of a buffer area of 100m / 0-10 (%) - continuous variable  | 0.000 / 1.000 | DCL_0_10B100    |
| Cave declivity 10 - 20 (%) - Base 100m | The steepness length of cave terrain measured by laser scanning within a radius of a buffer area of 100m / 10-20 (%) - continuous variable | 0.000 / 1.000 | DCL_10_20B100   |
| Cave declivity 20 - 30 (%) - Base 100m | The steepness length of cave terrain measured by laser scanning within a radius of a buffer area of 100m / 20-30 (%) - continuous variable | 0.000 / 1.000 | DCL_20_30B100   |
| Cave declivity 0 - 10 (%) - Base 250m  | The steepness length of cave terrain measured by laser scanning within a radius of a buffer area of 250m / 0-10 (%) - continuous variable  | 0.000 / 1.000 | DCL_0_10B250    |

|                                        |                                                                                                                                            |                  |               |
|----------------------------------------|--------------------------------------------------------------------------------------------------------------------------------------------|------------------|---------------|
| Cave declivity 10 - 20 (%) - Base 250m | The steepness length of cave terrain measured by laser scanning within a radius of a buffer area of 250m / 10-20 (%) - continuous variable | 0.000 / 1.000    | DCL_10_20B250 |
| Cave declivity 20 - 30 (%) - Base 250m | The steepness length of cave terrain measured by laser scanning within a radius of a buffer area of 250m / 20-30 (%) - continuous variable | 0.000 / 0.922    | DCL_20_30B250 |
| Cave declivity 30 - 40 (%) - Base 250m | The steepness length of cave terrain measured by laser scanning within a radius of a buffer area of 250m / 30-40 (%) - continuous variable | 0.000 / 0.004    | DCL_30_40B250 |
| Cave declivity 0 - 10 (%) - Base 500m  | The steepness length of cave terrain measured by laser scanning within a radius of a buffer area of 500m / 0-10 (%) - continuous variable  | 0.032 / 1.000    | DCL_0_10B500  |
| Cave declivity 10 - 20 (%) - Base 500m | The steepness length of cave terrain measured by laser scanning within a radius of a buffer area of 500m / 10-20 (%) - continuous variable | 0.000 / 0.799    | DCL_10_20B500 |
| Cave declivity 20 - 30 (%) - Base 500m | The steepness length of cave terrain measured by laser scanning within a radius of a buffer area of 500m / 20-30 (%) - continuous variable | 0.000 / 0.620    | DCL_20_30B500 |
| Cave declivity 30 - 40 (%) - Base 500m | The steepness length of cave terrain measured by laser scanning within a radius of a buffer area of 500m / 30-40 (%) - continuous variable | 0.000 / 0.031    | DCL_30_40B500 |
| Cave density - Base 50m                | Sum of the number of caves within a radius of a buffer area of 50m - Km <sup>2</sup> - continuous variable                                 | 0.026 / 1.642    | dens_50_km2   |
| Cave density - Base 100m               | Sum of caves the number of caves within a radius of a buffer area of 100m - Km <sup>2</sup> - continuous variable                          | 0.012 / 0.615    | dens_100_km2  |
| Cave density - Base 250m               | Sum of the number of caves within a radius of a buffer area of 250m - Km <sup>2</sup> - continuous variable                                | 0.003 / 0.248    | dens_250_km2  |
| Cave density - Base 500m               | Sum of the number of caves within a radius of a buffer area of 500m - Km <sup>2</sup> - continuous variable                                | 0.001 / 0.109    | dens_500_km2  |
| Cave distance to creeks (m)            | The distance from the cave to the closest creek (m) - continuous variable                                                                  | 0.000 / 2526.422 | dist_drainage |
| Colluvial or flood - Base 50m          | Geomorphology - Percentage of colluvial or flood terrain within a radius of a buffer area of 50m - continuous variable                     | 0.000 / 100.000  | CFLOOD_50     |
| Steep slope of erosion - Base 50m      | Geomorphology - Percentage of steep slope of erosion terrain within a radius of a buffer area of 50m - continuous variable                 | 0.000 / 100.000  | SSLOPE_50     |

|                                                 |                                                                                                                                          |                 |            |
|-------------------------------------------------|------------------------------------------------------------------------------------------------------------------------------------------|-----------------|------------|
| Homogeneous or sharp differential - Base 50m    | Geomorphology - Percentage of Homogeneous or sharp differential terrain within a radius of a buffer area of 50m - continuous variable    | 0.000 / 100.000 | HSHARP_50  |
| Homogeneous or convex differential - Base 50m   | Geomorphology - Percentage of Homogeneous or convex differential terrain within a radius of a buffer area of 50m - continuous variable   | 0.000 / 100.000 | HCONV_50   |
| Homogeneous or tabular differential - Base 50m  | Geomorphology - Percentage of Homogeneous or tabular differential terrain within a radius of a buffer area of 50m - continuous variable  | 0.000 / 100.000 | HTAB_50    |
| Buried pediplain degraded - Base 50m            | Geomorphology - Percentage of Buried pediplain terrain degraded within a radius of a buffer area of 50m - continuous variable            | 0.000 / 1.000   | PEDDEG_50  |
| Buried pediplain retocaded - Base 50m           | Geomorphology - Percentage of Buried pediplain retocaded terrain within a radius of a buffer area of 50m - continuous variable           | 0.000 / 100.000 | PEDRET_50  |
| Waterbody - Base 50m                            | Geomorphology - Percentage of Waterbody within a radius of a buffer area of 50m - continuous variable                                    | 0.000 / 99.636  | WBODY_50   |
| Colluvial or flood - Base 100m                  | Geomorphology - Percentage of colluvial or flood terrains terrain within a radius of a buffer area of 100m - continuous variable         | 0.000 / 100.000 | CFLOOD_100 |
| Steep slope of erosion - Base 100m              | Geomorphology - Percentage of Steep slope of erosion terrain within a radius of a buffer area of 100m - continuous variable              | 0.000 / 100.000 | SSLOPE_100 |
| Homogeneous or sharp differential - Base 100m   | Geomorphology - Percentage of Homogeneous or sharp differential terrain within a radius of a buffer area of 100m - continuous variable   | 0.000 / 100.000 | HSHARP_100 |
| Homogeneous or convex differential - Base 100m  | Geomorphology - Percentage of Homogeneous or convex differential terrain within a radius of a buffer area of 100m - continuous variable  | 0.000 / 100.000 | HCONV_100  |
| Homogeneous or tabular differential - Base 100m | Geomorphology - Percentage of Homogeneous or tabular differential terrain within a radius of a buffer area of 100m - continuous variable | 0.000 / 100.000 | HTAB_100   |
| Buried pediplain degraded - Base 100m           | Geomorphology - Percentage of Buried pediplain degraded terrain within a radius of a buffer area of 100m - continuous variable           | 0.000 / 18.230  | PEDDEG_100 |
| Buried pediplain retocaded - Base 100m          | Geomorphology - Percentage of Buried pediplain retocaded terrain within a radius of a buffer area of 100m - continuous variable          | 0.000 / 100.000 | PEDRET_100 |
| Waterbody - Base 100m                           | Geomorphology - Percentage of Waterbody within a radius of a buffer area of 100m - continuous variable                                   | 0.000 / 68.880  | WBODY_100  |

|                                                 |                                                                                                                                          |                 |            |
|-------------------------------------------------|------------------------------------------------------------------------------------------------------------------------------------------|-----------------|------------|
| Colluvial or flood - Base 250m                  | Geomorphology - Percentage of Colluvial or flood terrain within a radius of a buffer area of 250m - continuous variable                  | 0.000 / 77.319  | CFLOOD_250 |
| Steep slope of erosion - Base 250m              | Geomorphology - Percentage of Steep slope of erosion terrain within a radius of a buffer area of 250m - continuous variable              | 0.000 / 100.000 | SSLOPE_250 |
| Homogeneous or sharp differential - Base 250m   | Geomorphology - Percentage of Homogeneous or sharp differential terrain within a radius of a buffer area of 250m - continuous variable   | 0.000 / 100.000 | HSHARP_250 |
| Homogeneous or convex differential - Base 250m  | Geomorphology - Percentage of Homogeneous or convex differential terrain within a radius of a buffer area of 250m - continuous variable  | 0.000 / 100.000 | HCONV_250  |
| Homogeneous or tabular differential - Base 250m | Geomorphology - Percentage of Homogeneous or tabular differential terrain within a radius of a buffer area of 250m - continuous variable | 0.000 / 100.000 | HTAB_250   |
| Buried pediplain degraded - Base 250m           | Geomorphology - Percentage of Buried pediplain degraded terrain within a radius of a buffer area of 250m - continuous variable           | 0.000 / 31.465  | PEDDEG_250 |
| Buried pediplain retocaded - Base 250m          | Geomorphology - Percentage of Buried pediplain retocaded terrain within a radius of a buffer area of 250m - continuous variable          | 0.000 / 100.000 | PEDRET_250 |
| Waterbody - Base 250m                           | Geomorphology - Percentage of Waterbody within a radius of a buffer area of 250m - continuous variable                                   | 0.000 / 53.045  | WBODY_250  |
| Colluvial or flood - Base 500m                  | Geomorphology - Percentage of Colluvial or flood terrain within a radius of a buffer area of 500m - continuous variable                  | 0.000 / 50.472  | CFLOOD_500 |
| Steep slope of erosion - Base 500m              | Geomorphology - Percentage of Steep slope of erosion terrain within a radius of a buffer area of 500m - continuous variable              | 0.000 / 100.000 | SSLOPE_500 |
| Homogeneous or sharp differential - Base 500m   | Geomorphology - Percentage of Homogeneous or sharp differential terrain within a radius of a buffer area of 500m - continuous variable   | 0.000 / 100.000 | HSHARP_500 |
| Homogeneous or convex differential - Base 500m  | Geomorphology - Percentage of Homogeneous or convex differential terrain within a radius of a buffer area of 500m - continuous variable  | 0.000 / 100.000 | HCONV_500  |
| Homogeneous or tabular differential - Base 500m | Geomorphology - Percentage of Homogeneous or tabular differential terrain within a radius of a buffer area of 500m - continuous variable | 0.000 / 100.000 | HTAB_500   |
| Buried pediplain degraded - Base 500m           | Geomorphology - Percentage of Buried pediplain degraded terrain within a radius of a buffer area of 500m - continuous variable           | 0.000 / 32.100  | PEDDEG_500 |

|                                           |                                                                                                                                 |                 |             |
|-------------------------------------------|---------------------------------------------------------------------------------------------------------------------------------|-----------------|-------------|
| Buried pediplain retocaded - Base 500m    | Geomorphology - Percentage of Buried pediplain retocaded terrain within a radius of a buffer area of 500m - continuous variable | 0.000 / 100.000 | PEDRET_500  |
| Waterbody - Base 500m                     | Geomorphology - Percentage of Waterbody within a radius of a buffer area of 500m - continuous variable                          | 0.000 / 33.252  | WBODY_500   |
| Bare soil/Pasture/Agriculture - Base 50m  | Landcover - Percentage of Bare soil/Pasture/Agriculture within a radius of a buffer area of 50m - continuous variable           | 0.000 / 100.000 | BPA_50      |
| Forest - Base 50m                         | Landcover - Percentage of Forest within a radius of a buffer area of 50m - continuous variable                                  | 0.000 / 100.000 | FOREST_50   |
| Mining - Base 50m                         | Landcover - Percentage of Mining within a radius of a buffer area of 50m - continuous variable                                  | 0.000 / 100.000 | MINING_50   |
| Montane savanna - Base 50m                | Landcover - Percentage of Montane savanna within a radius of a buffer area of 50m - continuous variable                         | 0.000 / 100.000 | MONTSAV_50  |
| Unclassified - Base 50m                   | Landcover - Percentage of unclassified landcover within a radius of a buffer area of 50m - continuous variable                  | 0.000 / 16.315  | UNCLASS_50  |
| Bare soil/Pasture/Agriculture - Base 100m | Landcover - Percentage of Bare soil/Pasture/Agriculture within a radius of a buffer area of 100m - continuous variable          | 0.000 / 99.872  | BPA_100     |
| Forest - Base 100m                        | Landcover - Percentage of Forest within a radius of a buffer area of 100m - continuous variable                                 | 0.000 / 100.000 | FOREST_100  |
| Mining - Base 100m                        | Landcover - Percentage of Mining within a radius of a buffer area of 100m - continuous variable                                 | 0.000 / 98.004  | MINING_100  |
| Montane savanna - Base 100m               | Landcover - Percentage of Montane savanna within a radius of a buffer area of 100m - continuous variable                        | 0.000 / 100.000 | MONTSAV_100 |
| Unclassified - Base 100m                  | Landcover - Percentage of unclassified landcover within a radius of a buffer area of 100m - continuous variable                 | 0.000 / 34.262  | UNCLASS_100 |
| Bare soil/Pasture/Agriculture - Base 250m | Landcover - Percentage of Bare soil/Pasture/Agriculture within a radius of a buffer area of 250m - continuous variable          | 0.000 / 93.578  | BPA_250     |
| Forest - Base 250m                        | Landcover - Percentage of Forest within a radius of a buffer area of 250m - continuous variable                                 | 0.000 / 100.000 | FOREST_250  |
| Mining - Base 250m                        | Landcover - Percentage of Mining within a radius of a buffer area of 250m - continuous variable                                 | 0.000 / 74.167  | MINING_250  |
| Montane savanna -                         | Landcover - Percentage of Montane savanna                                                                                       | 0.000 / 100.000 | MONTSAV_2   |

|                                           |                                                                                                                         |                 |             |
|-------------------------------------------|-------------------------------------------------------------------------------------------------------------------------|-----------------|-------------|
| Base 250m                                 | within a radius of a buffer area of 250m - continuous variable                                                          |                 | 50          |
| Unclassified - Base 250m                  | Landcover - Percentage of unclassified landcover within a radius of a buffer area of 250m - continuous variable         | 0.000 / 18.273  | UNCLASS_250 |
| Bare soil/Pasture/Agriculture - Base 500m | Landcover - Percentage of Bare soil/Pasture/Agriculture within a radius of a buffer area of 500m                        | 0.000 / 83.902  | BPA_500     |
| Forest - Base 500m                        | Landcover - Percentage of Forest within a radius of a buffer area of 500m - continuous variable                         | 0.000 / 100.000 | FOREST_500  |
| Mining - Base 500m                        | Landcover - Percentage of Mining within a radius of a buffer area of 500m - continuous variable                         | 0.000 / 70.272  | MINING_500  |
| Montane savanna - Base 500m               | Landcover - Percentage of Montane savanna within a radius of a buffer area of 500m - continuous variable                | 0.000 / 100.000 | MONTSAV_500 |
| Unclassified - Base 500m                  | Landcover - Percentage of unclassified landcover within a radius of a buffer area of 500m - continuous variable         | 0.000 / 10.273  | UNCLASS_500 |
| BIF - Base 50m                            | Lithology - Percentage of Banded Iron Formation (BIF) within a radius of a buffer area of 50m - continuous variable     | 0.000 / 100.000 | BIF_50      |
| Laterites - Base 50m                      | Lithology - Percentage of Laterites within a radius of a buffer area of 50m - continuous variable                       | 0.000 / 49.548  | LATER_50    |
| Conglomerate - Base 50m                   | Lithology - Percentage of Conglomerate within a radius of a buffer area of 50m - continuous variable                    | 0.000 / 14.273  | CONGL_50    |
| Basic Rocks - Base 50m                    | Lithology - Percentage of Basic Rocks within a radius of a buffer area of 50m - continuous variable                     | 0.000 / 100.000 | BROCK_50    |
| Basement - Base 50m                       | Lithology - Percentage of crystalline basement rocks within a radius of a buffer area of 50m - continuous variable      | 0.000 / 2.342   | BASEMT_50   |
| No information - Base 50m                 | Lithology - Percentage of lithology's without information within a radius of a buffer area of 50m - continuous variable | 0.000 / 100.000 | LNOINFO_50  |
| BIF - Base 100m                           | Lithology - Percentage of Banded Iron Formation (BIF) within a radius of a buffer area of 100m - continuous variable    | 0.000 / 100.000 | BIF_100     |
| Laterites - Base 100m                     | Lithology - Percentage of Laterites within a radius of a buffer area of 100m - continuous variable                      | 0.000 / 24.448  | LATER_100   |
| Conglomerate - Base 100m                  | Lithology - Percentage of Conglomerate within a radius of a buffer area of 100m - continuous variable                   | 0.000 / 28.474  | CONGL_100   |

|                            |                                                                                                                          |                 |             |
|----------------------------|--------------------------------------------------------------------------------------------------------------------------|-----------------|-------------|
| Basic Rocks - Base 100m    | Lithology - Percentage of Basic Rocks within a radius of a buffer area of 100m - continuous variable                     | 0.000 / 100.000 | BROCK_100   |
| Basement - Base 100m       | Lithology - Percentage of crystalline basement rocks within a radius of a buffer area of 100m - continuous variable      | 0.000 / 12.623  | BASEMT_100  |
| No information - Base 100m | Lithology - Percentage of lithology's without information within a radius of a buffer area of 100m - continuous variable | 0.000 / 100.000 | LNOINFO_100 |
| BIF - Base 250m            | Lithology - Percentage of Banded Iron Formation (BIF) within a radius of a buffer area of 250m - continuous variable     | 0.000 / 100.000 | BIF_250     |
| Laterites - Base 250m      | Lithology - Percentage of Laterites within a radius of a buffer area of 250m - continuous variable                       | 0.000 / 7.679   | LATER_250   |
| Conglomerate - Base 250m   | Lithology - Percentage of Conglomerate within a radius of a buffer area of 250m - continuous variable                    | 0.000 / 41.714  | CONGL_250   |
| Basic Rocks - Base 250m    | Lithology - Percentage of Basic Rocks within a radius of a buffer area of 250m - continuous variable                     | 0.000 / 100.000 | BROCK_250   |
| Basement - Base 250m       | Lithology - Percentage of crystalline basement rocks within a radius of a buffer area of 250m - continuous variable      | 0.000 / 29.380  | BASEMT_250  |
| No information - Base 250m | Lithology - Percentage of lithology's without information within a radius of a buffer area of 250m - continuous variable | 0.000 / 100.000 | LNOINFO_250 |
| BIF - Base 500m            | Lithology - Percentage of Banded Iron Formation (BIF) within a radius of a buffer area of 500m - continuous variable     | 0.000 / 100.000 | BIF_500     |
| Laterites - Base 500m      | Lithology - Percentage of Laterites within a radius of a buffer area of 500m - continuous variable                       | 0.000 / 5.198   | LATER_500   |
| Conglomerate - Base 500m   | Lithology - Percentage of Conglomerate within a radius of a buffer area of 500m - continuous variable                    | 0.000 / 50.444  | CONGL_500   |
| Basic Rocks - Base 500m    | Lithology - Percentage of Basic Rocks within a radius of a buffer area of 500m - continuous variable                     | 0.000 / 100.000 | BROCK_500   |
| Basement - Base 500m       | Lithology - Percentage of crystalline basement rocks within a radius of a buffer area of 500m - continuous variable      | 0.000 / 40.907  | BASEMT_500  |
| No information - Base 500m | Lithology - Percentage of lithology's without information within a radius of a buffer area of 500m - continuous variable | 0.000 / 100.000 | LNOINFO_500 |



**Table S2:** Mean age estimates (in million years) for internal nodes of the troglobite phylogeny (Fig. S2).

| <b>Node Name</b>                 | <b>Age Estimate [Myr]</b> |
|----------------------------------|---------------------------|
| Protostamia                      | 790                       |
| Ecdysozoa                        | 728                       |
| Arthropoda                       | 698.5                     |
| Lophotrochozoa                   | 698                       |
| [Arachnida + Dilopoda]           | 642                       |
| [Chilopoda + Dilopoda]           | 524                       |
| Arachnida                        | 494                       |
| Diplopoda                        | 460                       |
| [Opiliones + Pseudoscorpiones]   | 459                       |
| Polydesmida                      | 443                       |
| Opiliones                        | 439                       |
| Insecta                          | 424                       |
| Glomeridesmida                   | 366                       |
| [Araneae + Schizomida]           | 362                       |
| [Malacotaca + Insecta]           | 355                       |
| [Hemiptera + Tysanura]           | 344                       |
| Collembola                       | 337                       |
| Malacostraca                     | 334                       |
| [Coleoptera + Hymenoptera]       | 325                       |
| Hemiptera                        | 302                       |
| Entomobryomorpha                 | 284                       |
| Coleoptera                       | 277                       |
| [Carabidae + Copelatinae]        | 237.2                     |
| [Tenebrionoidea + Staphylinidae] | 234.8                     |
| [Scydmaenidae + Histeridae]      | 228                       |
| Hymenoptera                      | 145                       |

**Table S3:** Summary of the models describing total species richness, troglobitic species richness and presence of rare troglobites in relation to the mining area surrounding caves.

| <b>Response variable</b>                  | <b>Predictor variable</b> | <b>Estimate</b> | <b>SE</b> | <b>z</b> | <b>p</b> |
|-------------------------------------------|---------------------------|-----------------|-----------|----------|----------|
| Total species richness <sup>a</sup>       | Mining area (50m)         | 0.01            | 0.05      | 0.21     | 0.84     |
|                                           | Mining area (100m)        | 0.00            | 0.04      | -0.02    | 0.98     |
|                                           | Mining area (250m)        | -0.01           | 0.02      | -0.31    | 0.75     |
|                                           | Mining area (500m)        | -0.02           | 0.03      | -0.66    | 0.51     |
| Troglobitic species richness <sup>a</sup> | Mining area (50m)         | -0.05           | 0.05      | -1.00    | 0.32     |
|                                           | Mining area (100m)        | -0.02           | 0.04      | -0.51    | 0.61     |
|                                           | Mining area (250m)        | 0.04            | 0.04      | 1.16     | 0.25     |
|                                           | Mining area (500m)        | 0.03            | 0.04      | 0.72     | 0.47     |
| Presence of rare troglobites <sup>b</sup> | Mining area (50m)         | -0.27           | 0.25      | -1.09    | 0.28     |
|                                           | Mining area (100m)        | -0.21           | 0.16      | -1.32    | 0.19     |
|                                           | Mining area (250m)        | -0.18           | 0.1       | -1.77    | 0.08     |
|                                           | Mining area (500m)        | -0.09           | 0.09      | -0.93    | 0.35     |

Response variables are shown followed by the predictor variable included in each model (models contained a single predictor), estimates, standard errors (SE), *z*-values and *p*-values. All models accounted for spatial autocorrelation and unaccounted variation between study sites by keeping the highland where the caves were located as a random effect. Two out of the 473 caves were excluded from these analyses because they contained missing data in at least one field. <sup>a</sup> Species richness was modeled using GLMM with Poisson distributed errors. <sup>b</sup> Presence of rare troglobites was modeled using GLMM with Bernoulli distributed responses (logistic regressions).
